# Supplementary material for: Radiation Induced Surface Modification of Nanoparticles and Their Dispersion in the Polymer Matrix
Source: Nanomaterials (Basel). 2020 Nov 11;10(11):2237. doi: 10.3390/nano10112237 (PMC7697188; doi:10.3390/nano10112237)
Supplement: Supplementary file 1 [file nanomaterials-10-02237-s001.pdf]

# Supplementary Materials: Radiation Induced Surface Modification of Nanoparticles and their Dispersion in Polymer Matrix

Zhiang Fu <sup>1,2,3</sup>, Xiaoying Gu <sup>2</sup>, Lingmin Hu <sup>2</sup>, Yongjin Li <sup>2,\*</sup> and Jingye Li <sup>1,\*</sup>

## Table of contents

|                    |                                                                                                                                                                                                                                                                                                                                                                                              |
|--------------------|----------------------------------------------------------------------------------------------------------------------------------------------------------------------------------------------------------------------------------------------------------------------------------------------------------------------------------------------------------------------------------------------|
| <b>Equation S1</b> | Equation for calculating the grafting content of PVDF on F-SiO <sub>2</sub> nanoparticles surface.                                                                                                                                                                                                                                                                                           |
| <b>Figure S1</b>   | <sup>13</sup> C-NMR spectra of pristine SiO <sub>2</sub> , SiO <sub>2</sub> -vinyl and F-SiO <sub>2</sub> nanoparticles, respectively.                                                                                                                                                                                                                                                       |
| <b>Figure S2</b>   | (a) XRD patterns of pristine SiO <sub>2</sub> , SiO <sub>2</sub> -vinyl, F-SiO <sub>2</sub> and PVDF; (b) Enlarged XRD patterns of pristine SiO <sub>2</sub> , SiO <sub>2</sub> -vinyl, F-SiO <sub>2</sub> in the 2θ range of 15-30°. (c) Enlarged Rietveld refinement of the pristine SiO <sub>2</sub> , SiO <sub>2</sub> -vinyl and F-SiO <sub>2</sub> XRD data in the 2θ range of 15-30°. |
| <b>Figure S3</b>   | SEM and Elemental Mapping image (EMI) of PVDF matrix incorporated with 3wt% (a) pristine SiO <sub>2</sub> , (b) SiO <sub>2</sub> -vinyl and (c) F-SiO <sub>2</sub> nanoparticles, respectively; the subscript of 1 and 2 are correspond to the signal of silicon and fluoride element in EMI, respectively.                                                                                  |
| <b>Figure S4</b>   | AFM of PVDF matrix incorporated with 3wt% (a) pristine SiO <sub>2</sub> , (b) SiO <sub>2</sub> -vinyl and (c) F-SiO <sub>2</sub> nanoparticles, respectively.                                                                                                                                                                                                                                |
| <b>Figure S5</b>   | SEM image of PVDF matrix incorporated 5wt%(a), 20wt%(b), 35wt%(c) SiO <sub>2</sub> nanoparticles, respectively.                                                                                                                                                                                                                                                                              |
| <b>Figure S6</b>   | Digital photograph of PVDF matrix incorporated 3wt% (a) - 35wt% (g) SiO <sub>2</sub> nanoparticles, respectively; Digital photograph of PVDF matrix incorporated 3wt% (h) - 35wt% (n) F-SiO <sub>2</sub> nanoparticles, respectively.                                                                                                                                                        |
| <b>Figure S7</b>   | DSC spectra of 1st cooling (c) and 2nd heating (d) of PVDF matrix incorporated with 3wt%, 5wt%, 20wt%, 35wt% SiO <sub>2</sub> nanoparticles, respectively.                                                                                                                                                                                                                                   |
| <b>Figure S8</b>   | XRD spectra of PVDF matrix incorporated with 3 wt% SiO <sub>2</sub> , SiO <sub>2</sub> -vinyl and F-SiO <sub>2</sub> nanoparticles, respectively.                                                                                                                                                                                                                                            |
| <b>Table S1</b>    | Molecular parameter of the surface modified silica NPs                                                                                                                                                                                                                                                                                                                                       |
| <b>Table S2</b>    | The graft content of PVDF grafted onto silica nanoparticles under different reactant ratio (wt% /wt%) and irradiation dose                                                                                                                                                                                                                                                                   |

$$w_{\text{PVDF}} = \frac{m_{\text{graft PVDF}}}{m_{\text{F-SiO}_2}} \quad (1)$$

$$= \frac{f_{\text{SiO}_2} \cdot (f_{\text{SiO}_2\text{-vinyl}} - f_{\text{F-SiO}_2})}{f_{\text{SiO}_2} \cdot f_{\text{SiO}_2\text{-vinyl}} \cdot (f_{\text{F-SiO}_2} - f_{\text{PVDF}}) + f_{\text{SiO}_2} \cdot (f_{\text{SiO}_2\text{-vinyl}} - f_{\text{PVDF}}) - f_{\text{SiO}_2\text{-vinyl}} \cdot (f_{\text{F-SiO}_2} - f_{\text{PVDF}})}$$

**Equation S1.** Equation for calculating the grafting content of PVDF on F-SiO<sub>2</sub> nanoparticles surface. Where  $w_{\text{PVDF}}$  is the grafting ratio of the grafted PVDF chain on the surface of SiO<sub>2</sub>, which based on the TGA data.  $m_{\text{graft PVDF}}$  is the actual number mass of grafting PVDF chain on the surface of SiO<sub>2</sub>.  $m_{\text{F-SiO}_2}$  is the number mass of the F-SiO<sub>2</sub> nanoparticles, which calculated by the content of PVDF and  $\gamma$ -MPS on the F-SiO<sub>2</sub> nanoparticles surface.  $f_{\text{SiO}_2}$ ,  $f_{\text{SiO}_2\text{-vinyl}}$ ,  $f_{\text{F-SiO}_2}$  and  $f_{\text{PVDF}}$  were represented the inorganic residual content of pristine SiO<sub>2</sub>, SiO<sub>2</sub>-vinyl, F-SiO<sub>2</sub> and PVDF after the TGA test respectively.

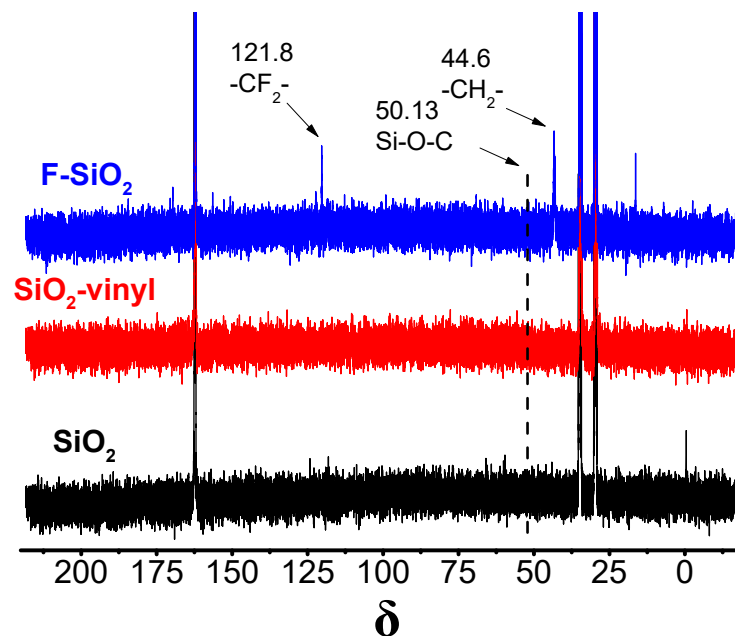

**Figure S1.** <sup>13</sup>C-NMR spectra of pristine SiO<sub>2</sub>, SiO<sub>2</sub>-vinyl and F-SiO<sub>2</sub> nanoparticles, respectively.

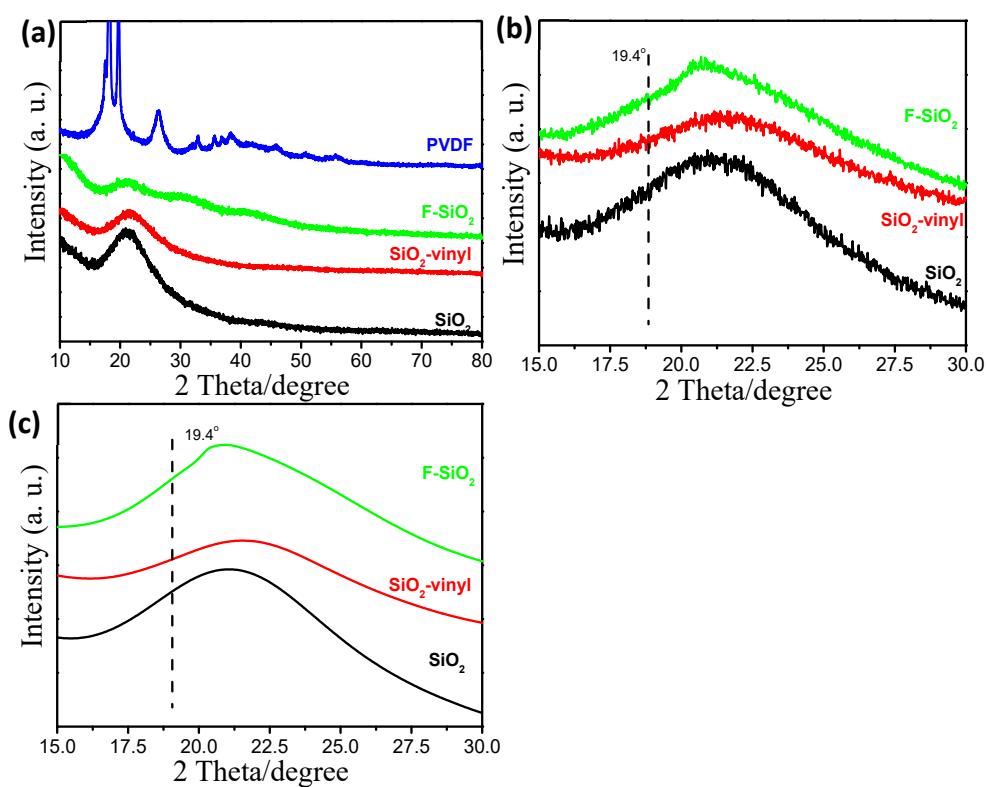

**Figure S2.** (a) XRD patterns of pristine SiO<sub>2</sub>, SiO<sub>2</sub>-vinyl, F-SiO<sub>2</sub> and PVDF; (b) Enlarged XRD patterns of pristine SiO<sub>2</sub>, SiO<sub>2</sub>-vinyl, F-SiO<sub>2</sub> in the 2θ range of 15–30°. (c) Enlarged Rietveld refinement of the pristine SiO<sub>2</sub>, SiO<sub>2</sub>-vinyl and F-SiO<sub>2</sub> XRD data in the 2θ range of 15–30°.

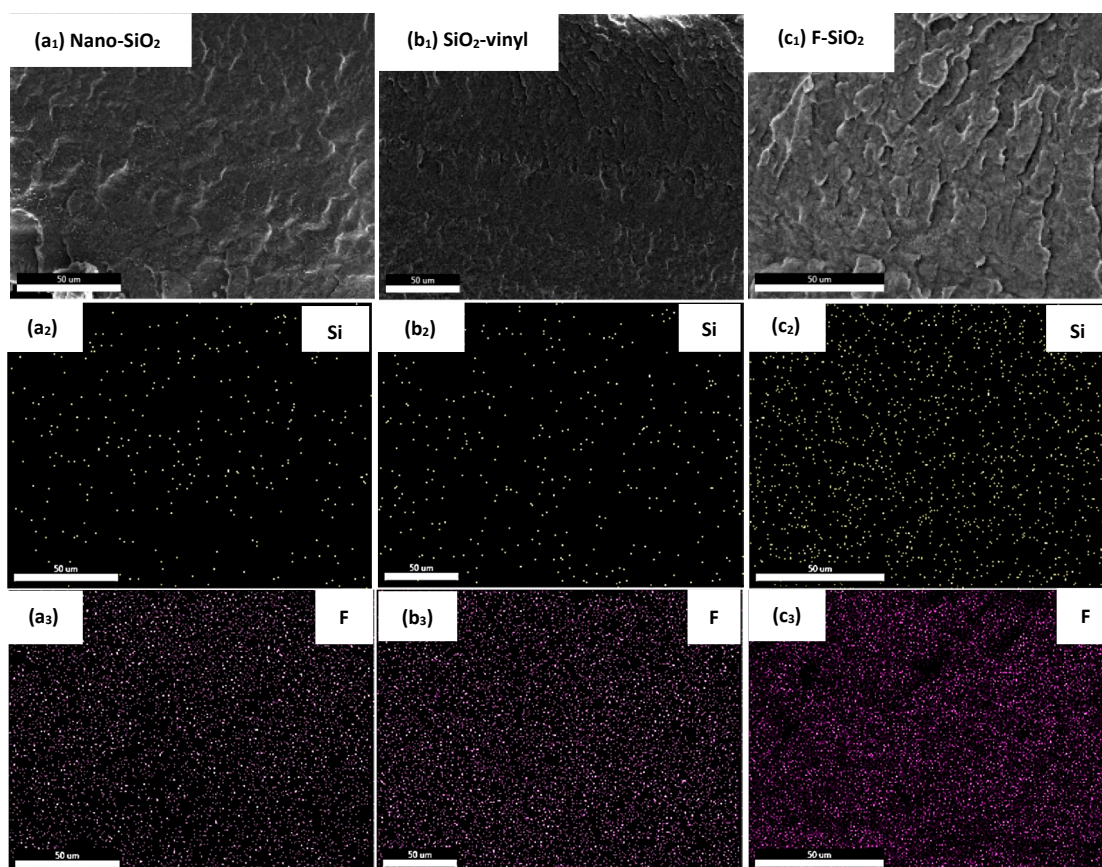

**Figure S3.** SEM and Elemental Mapping image (EMI) of PVDF matrix incorporated with 3wt% (a) pristine  $\text{SiO}_2$ , (b)  $\text{SiO}_2$ -vinyl and (c) F- $\text{SiO}_2$  nanoparticles, respectively; the subscript of 1 and 2 are correspond to the signal of silicon and fluoride element in EMI, respectively.

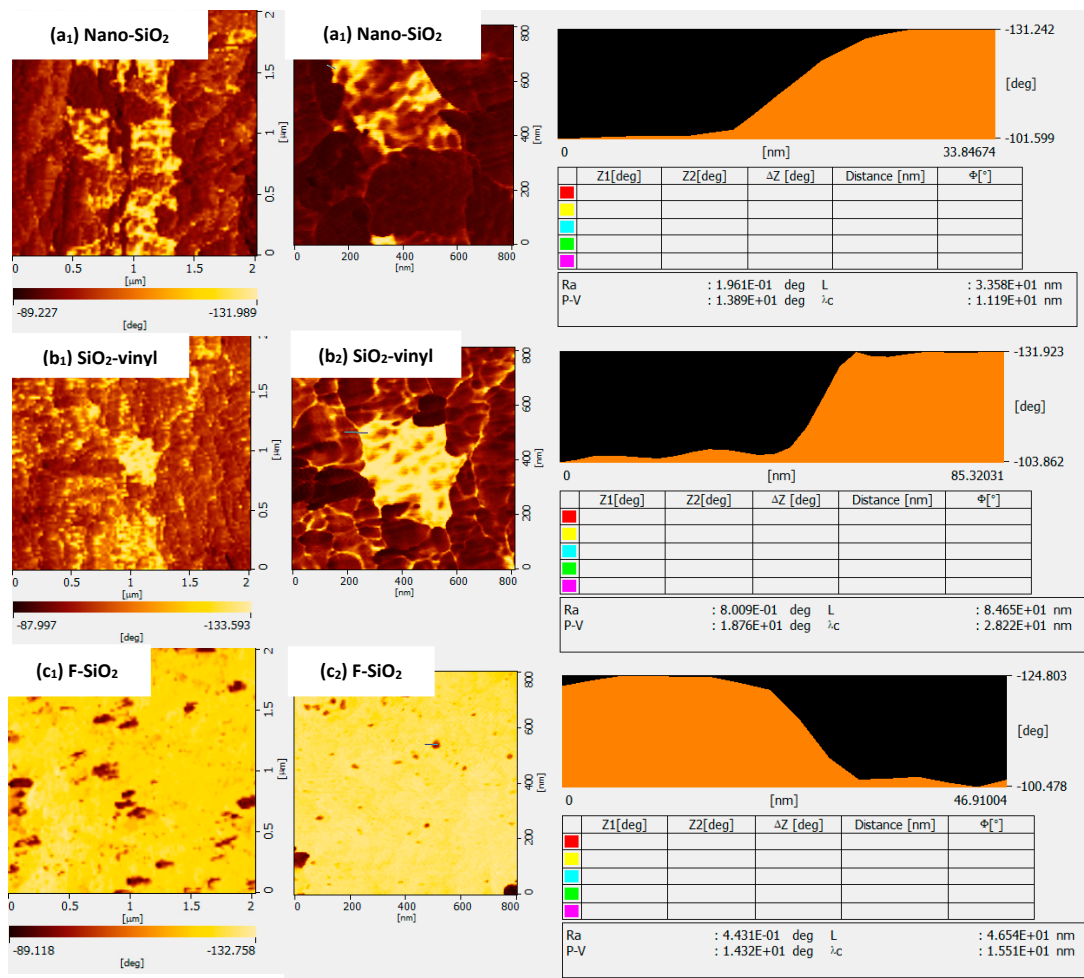

**Figure S4.** AFM of PVDF matrix incorporated with 3wt% (a) pristine  $\text{SiO}_2$ , (b)  $\text{SiO}_2$ -vinyl and (c) F- $\text{SiO}_2$  nanoparticles, respectively.

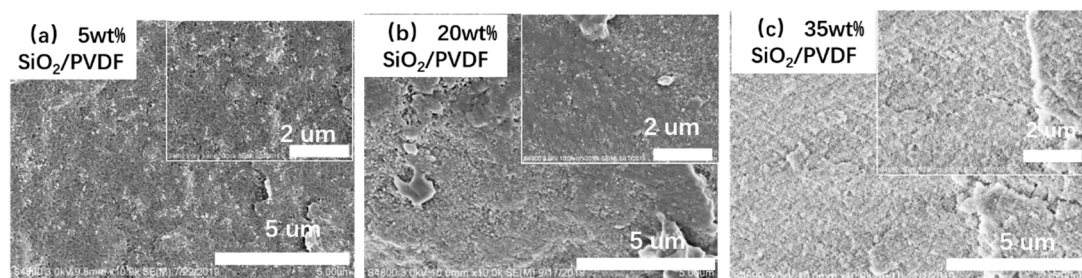

**Figure S5.** SEM image of PVDF matrix incorporated 5wt% (a), 20wt% (b), 35wt% (c)  $\text{SiO}_2$  nanoparticles, respectively.

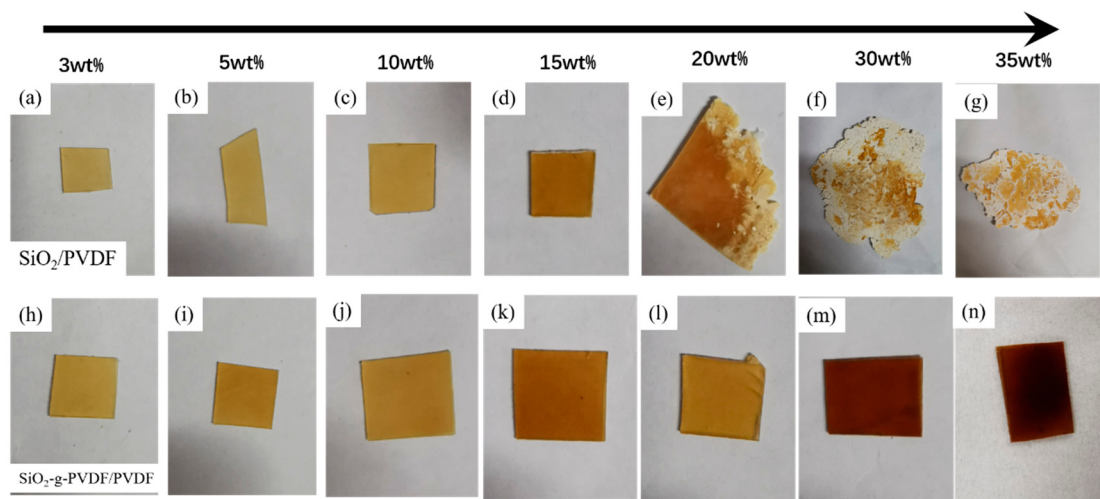

**Figure S6.** Digital photograph of PVDF matrix incorporated 3wt% (a–g) 35wt%  $\text{SiO}_2$  nanoparticles, respectively; Digital photograph of PVDF matrix incorporated 3wt% (h–n) 35wt% F- $\text{SiO}_2$  nanoparticles, respectively.

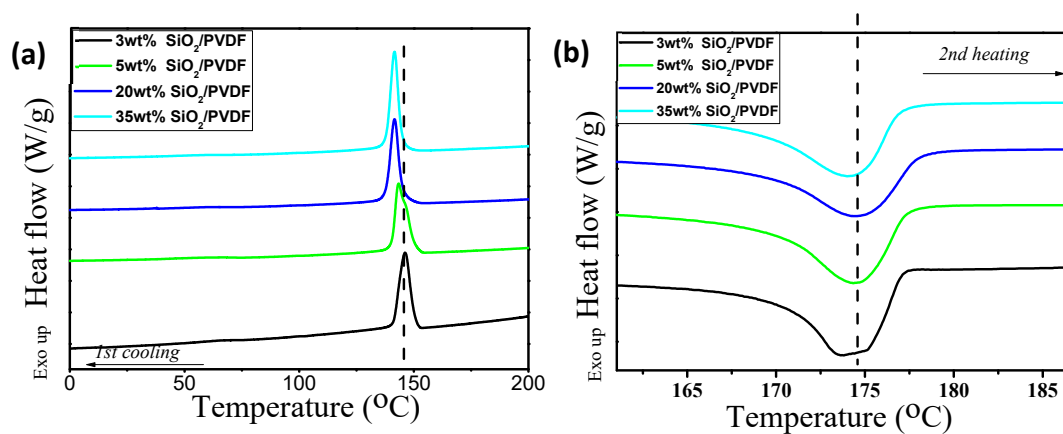

**Figure S7.** DSC spectra of 1st cooling (a) and 2nd heating (b) of PVDF matrix incorporated with 3wt%, 5wt%, 20wt%, 35wt%  $\text{SiO}_2$  nanoparticles, respectively.

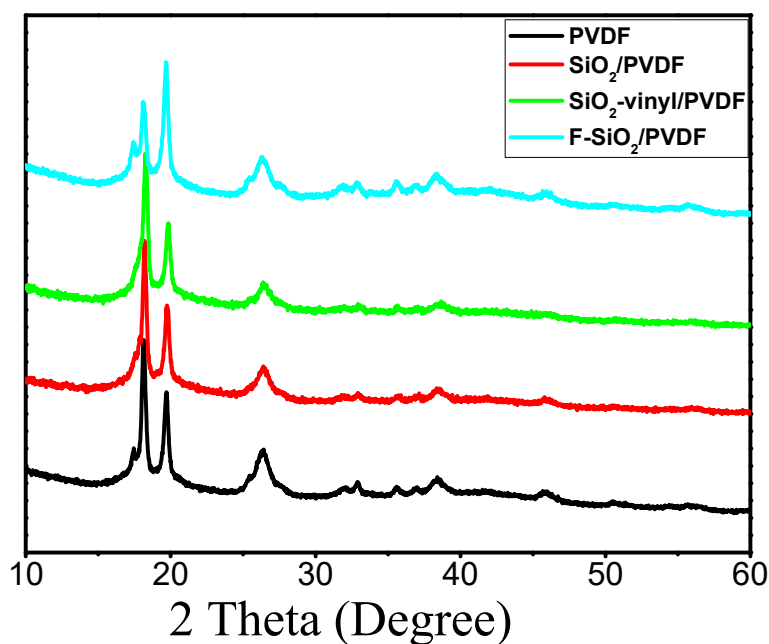

**Figure S8.** XRD spectra of PVDF matrix incorporated with 3 wt% SiO<sub>2</sub>, SiO<sub>2</sub>-vinyl and F-SiO<sub>2</sub> nanoparticles, respectively.

**Table S1.** Molecular parameter of the surface modified silica NPs.

| Sample                  | $d^a$ (nm) | $T_d^b$ (°C) | $f_{inorganic}^b$ (%) | $w_{\gamma-MPS}^c$ (%) | $w_{PVDF}^c$ (%) |
|-------------------------|------------|--------------|-----------------------|------------------------|------------------|
| SiO <sub>2</sub>        | 10.3±1.6   | -            | 98.0                  | -                      | -                |
| SiO <sub>2</sub> -vinyl | 10.1±2.1   | 439.6        | 95.2                  | 3.4                    | -                |
| F-SiO <sub>2</sub>      | 15.3±3.5   | 467.4        | 74.5                  | 3.4                    | 35.9             |

<sup>a</sup> Measured from TEM images ( $d$ : number averaged diameter of nanoparticles). <sup>b</sup> Measured from the TGA curves of purified specimen ( $T_d$ : the TGA temperature with maximum loss rate;  $f_{inorganic}$ : inorganic residual content of modification nanoparticles after TGA test). <sup>c</sup> Calculated by equation (1) based on TGA data ( $w_{\gamma-MPS}$ : graft content of  $\gamma$ -MPS functionalized on the silica nanoparticles surface;  $w_{PVDF}$ : graft content of PVDF grafted onto the silica nanoparticles surface;).

**Table S2.** The graft content of PVDF grafted onto silica nanoparticles under different reactant ratio (wt% /wt%) and irradiation dose.

| Code | [SiO <sub>2</sub> ]:[PVDF]<br>(wt% / wt%) | Absorbed<br>Dose<br>(kGy) | Time<br>(h) | $T_d^a$<br>(°C) | $f_{inorganic}^b$<br>(%) | $w_{PVDF}^b$<br>(%) |
|------|-------------------------------------------|---------------------------|-------------|-----------------|--------------------------|---------------------|
| 1    | 1:0.1                                     | 30                        | 17          | 433.3           | 92.7                     | 4.0                 |
| 2    | 1:0.3                                     | 30                        | 17          | 436.9           | 90.0                     | 6.8                 |
| 3    | 1:0.5                                     | 30                        | 17          | 438.2           | 88.8                     | 8.1                 |
| 4    | 1:0.7                                     | 30                        | 17          | 445.7           | 82.0                     | 15.1                |
| 5    | 1:1                                       | 30                        | 17          | 460.4           | 79.5                     | 17.7                |
| 6    | 1:2                                       | 30                        | 17          | 467.4           | 74.5                     | 26.1                |
| 7    | 1:2                                       | 50                        | 17          | 465.7           | 67.0                     | 30.6                |
| 8    | 1:2                                       | 70                        | 17          | 458.1           | 66.4                     | 31.3                |

<sup>a</sup> Measured from the TGA curves of purified specimen ( $T_d$ : the TGA temperature with maximum loss rate;  $f_{inorganic}$ : inorganic residual content of modification nanoparticles after TGA test). <sup>b</sup> Calculated

by equation (1) based on TGA data ( $w_{\gamma-MPS}$ : graft content of PVDF grafted onto the silica nanoparticles surface).
